# Supplementary material for: Class I histone deacetylase inhibition is synthetic lethal with BRCA1 deficiency in breast cancer cells
Source: PubMed Central journal article supplement — Acta Pharm Sin B. 2019 Sep 5;10(4):615–27. doi: 10.1016/j.apsb.2019.08.008 (PMC7161709; doi:10.1016/j.apsb.2019.08.008), 2019-09-05
Supplement: mmc2.pdf [file mmc2.pdf]

**Supporting Information for  
Original article**

**Class I histone deacetylase inhibition is synthetic lethal with BRCA1 deficiency in breast cancer cells**

Baoyuan Zhang<sup>a</sup>, Junfang Lyu<sup>a</sup>, Eun Ju Yang<sup>a</sup>, Yifan Liu<sup>a</sup>, Changjie Wu<sup>a</sup>, Lakhansing Pardeshi<sup>b</sup>, Kaeling Tan<sup>b</sup>, Qiang Chen<sup>a,b</sup>, Xiaoling Xu<sup>a,b</sup>, Chu-Xia Deng<sup>a,b</sup>, Joong Sup Shim<sup>a,b,\*</sup>

<sup>a</sup>*Cancer Centre, Faculty of Health Sciences, University of Macau, Macau SAR, China*

<sup>b</sup>*Institute of Translational Medicine, Faculty of Health Sciences, University of Macau, Macau SAR, China*

Received 24 May 2019; received in revised form 25 July 2019; accepted 27 July 2019

\*Corresponding author.

E-mail address: [jsshim@um.edu.mo](mailto:jsshim@um.edu.mo) (Joong Sup Shim).

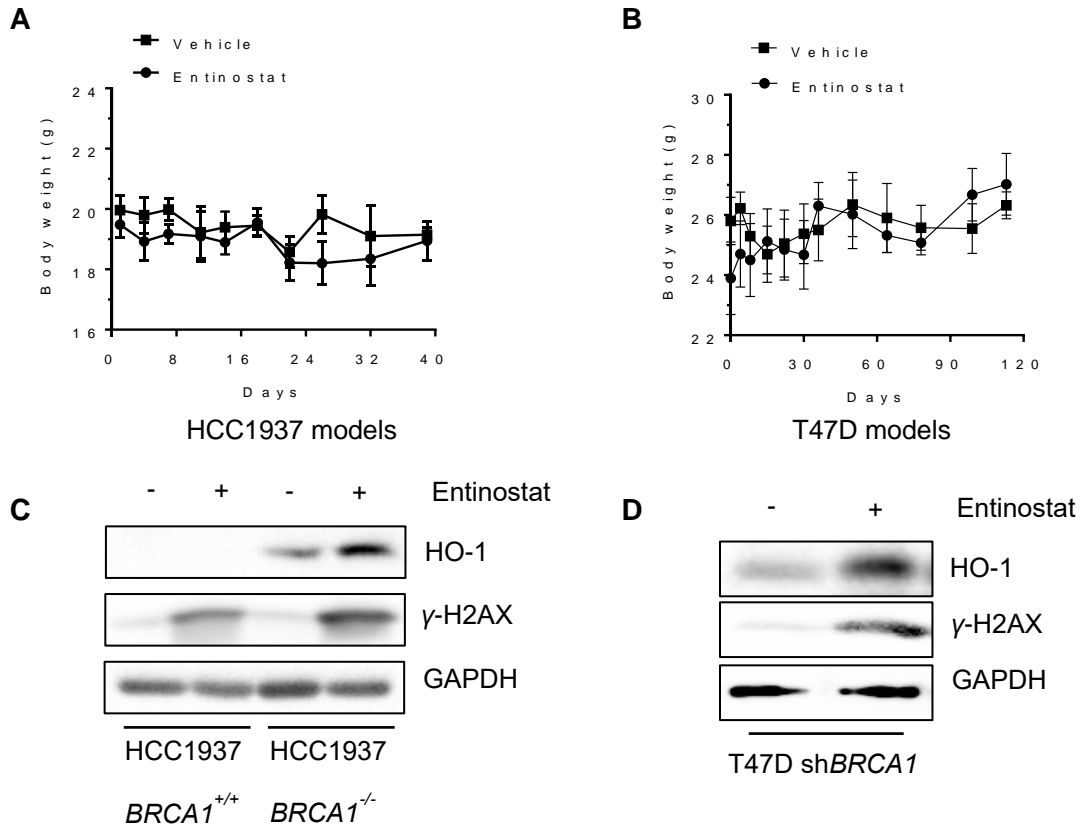

**Figure S1** Body weight changes and tumor Western blots from the mice bearing HCC1937 and T47D tumor xenografts. (A) and (B) Body weight changes of the mice bearing HCC1937 (A) and T47D (B) tumors during the treatment course are shown. (C) and (D) Western blot analysis of oxidative stress and DNA damage response proteins in tumors isolated from the mice.

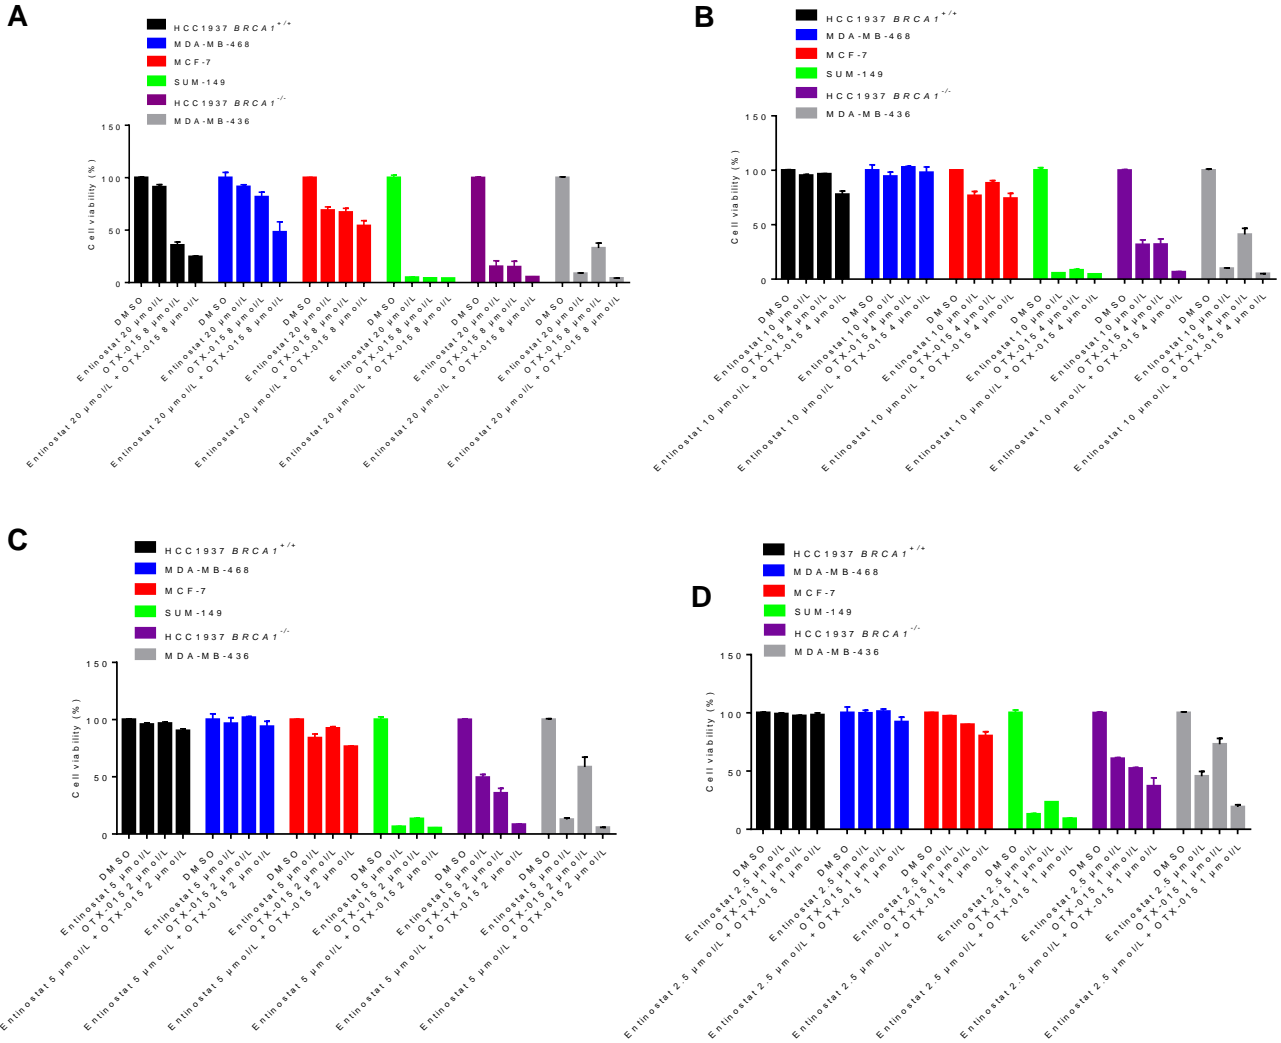

**Figure S2** Enhanced synthetic lethality effect by the combination of bromodomain and extraterminal motif (BET) and HDAC inhibition in BRCA1 deficient breast cancer cells. The synthetic lethality effect of the combination of BET and HDAC inhibitors in the panel of breast cancer cells with different BRCA1 status was tested. The cells were treated with single or combination of 4× (A), 2× (B), 1× (C) and 0.5× (D) concentrations of IC<sub>50</sub> of OTX-015 and entinostat for 72 h and alamarblue assay was performed to assess cell viability.

**Table S1** The sequence information of the siRNAs used in this study.

| Target             | siRNA sequence                                               |  |
|--------------------|--------------------------------------------------------------|--|
| <i>TXNIP</i> Sense | 5'-rArArGrCrArGrCrUrUrUrArCrCrUrArCrUrUrGrUrUrUrCTT-3'       |  |
| Antisense          | 5'-rArArGrArArArCrArArGrUrArGrGrUrArArArGrCrUrGrCrUrUrCrU-3' |  |

**Table S2** The sequence information of the primers for RT-qPCR used in this study.

| Target                     | Primer                                                                        |
|----------------------------|-------------------------------------------------------------------------------|
| <i>TXNIP</i> promoter site | Forward: 5'-CAGCGATCTCACTGATTG-3'<br>Reverse: 5'-AGTTTCAAGCAGGAGGCG-3'        |
| <i>TXNIP</i>               | Forward: 5'-TGGATCTGGTGGATGTCAATAC-3'<br>Reverse: 5'-GCGCATGTCCCTGAGATAATA-3' |
| <i>GAPDH</i>               | Forward: 5'-CAATTCCCCATCTCAGTCGT-3'<br>Reverse: 5'-TAGTAGCCGGGCCCTACTTT-3'    |

**Table S3** Information of antibodies used in this study.

| Primary antibody                | Supplier                  | Cat. No.   | Species | Dilution factor |
|---------------------------------|---------------------------|------------|---------|-----------------|
| $\alpha$ -Tubulin               | Santa Cruz Biotechnology  | sc-5286    | Mouse   | 1:2000          |
| BRCA1                           | Santa Cruz Biotechnology  | sc-642     | Rabbit  | 1:200           |
| Cleaved caspase-3               | Cell Signaling Technology | 9661S      | Rabbit  | 1:2000          |
| $\gamma$ -H2AX                  | Cell Signaling Technology | 9718S      | Rabbit  | 1:4000          |
| GAPDH                           | Santa Cruz Biotechnology  | sc-365062  | Mouse   | 1:2000          |
| HO-1                            | Santa Cruz Biotechnology  | sc-136960  | Mouse   | 1:400           |
| HSP90                           | Santa Cruz Biotechnology  | sc-69703   | Mouse   | 1:2000          |
| MLXIP                           | Proteintech               | 13614-1-AP | Rabbit  | 1:2000          |
| PARP-1                          | Santa Cruz Biotechnology  | sc-7150    | Rabbit  | 1:1000          |
| TXNIP                           | Cell Signaling Technology | 14715S     | Rabbit  | 1:2000          |
| Goat anti-mouse,<br>HRP linked  | Santa Cruz Biotechnology  | sc-2005    | Goat    | 1:2000          |
| Goat anti-rabbit,<br>HRP linked | Santa Cruz Biotechnology  | sc-2004    | Goat    | 1:2000          |
